# Supplementary material for: Efficient functionalisation of dextran-aldehyde with catechin: potential applications in the treatment of cancer
Source: Royal Society of Chemistry journal article supplement (doi:10.1039/c6py00228e), 2016-01-01
Supplement: c6py00228e1.pdf [file c6py00228e1.pdf]

## Supplementary Information

### Efficient Functionalisation of Dextran-Aldehyde with Catechin: Potential Applications in the treatment of Cancer

Susan Oliver,<sup>a,b</sup> Donald S. Thomas,<sup>c</sup> Maria Kavallaris,<sup>d,e</sup> Orazio Vittorio,<sup>d,e\*</sup> and Cyrille Boyer<sup>a,b\*</sup>

<sup>a</sup>Australian Centre for NanoMedicine (ACN), School of Chemical Engineering, UNSW Australia, Sydney, Australia 2052.

<sup>b</sup>Centre for Advanced Macromolecular Design (CAMD), School of Chemical Engineering, UNSW Australia, Sydney, Australia 2052.

<sup>c</sup>Nuclear Magnetic Resonance Facility, Mark Wainwright Analytical Centre, UNSW Australia, Sydney, Australia 2052.

<sup>d</sup>Children's Cancer Institute Australia, Lowy Cancer Research Centre, UNSW Australia, Sydney, Australia 2052.

<sup>e</sup>ARC Centre of Excellence in Convergent Bio-Nano Science and Technology, Australian Centre for NanoMedicine (ACN), UNSW Australia, Sydney, Australia 2052.

#### Additional Figures:

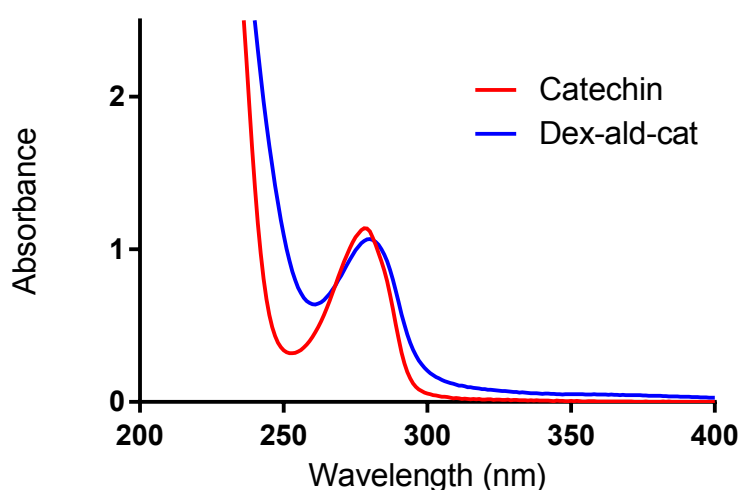

**Figure S1:** UV-Vis spectra of catechin and dex-ald-cat

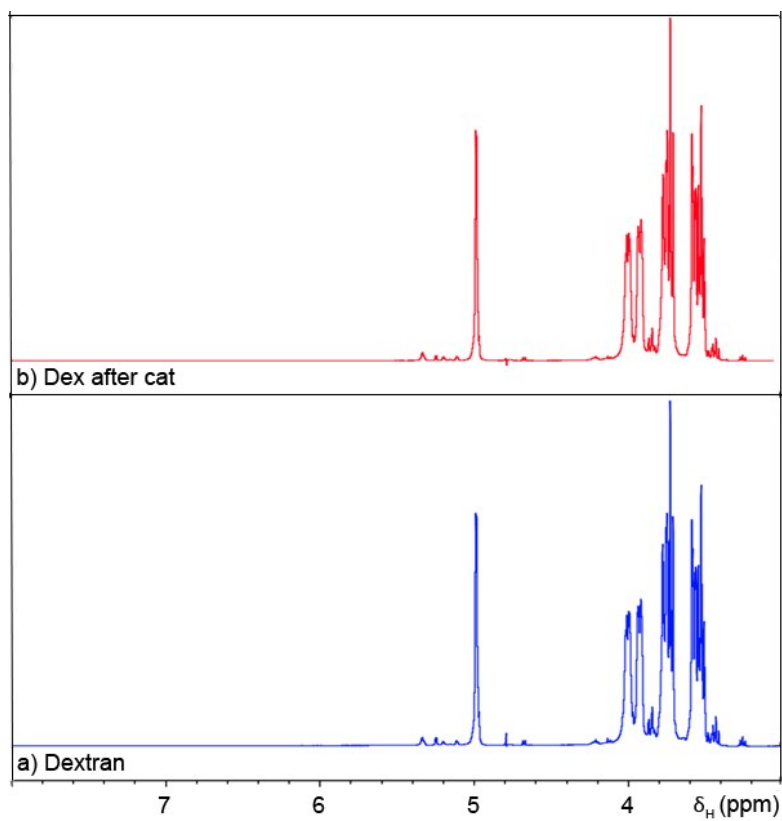

**Figure S2:** Overlay of  $^1\text{H}$  NMR spectra in 15%  $\text{DMSO-d}_6$  / 85%  $\text{D}_2\text{O}$  of dextran (a), dextran after stirring with catechin in reaction mixture for 48 h then dialysing (b).

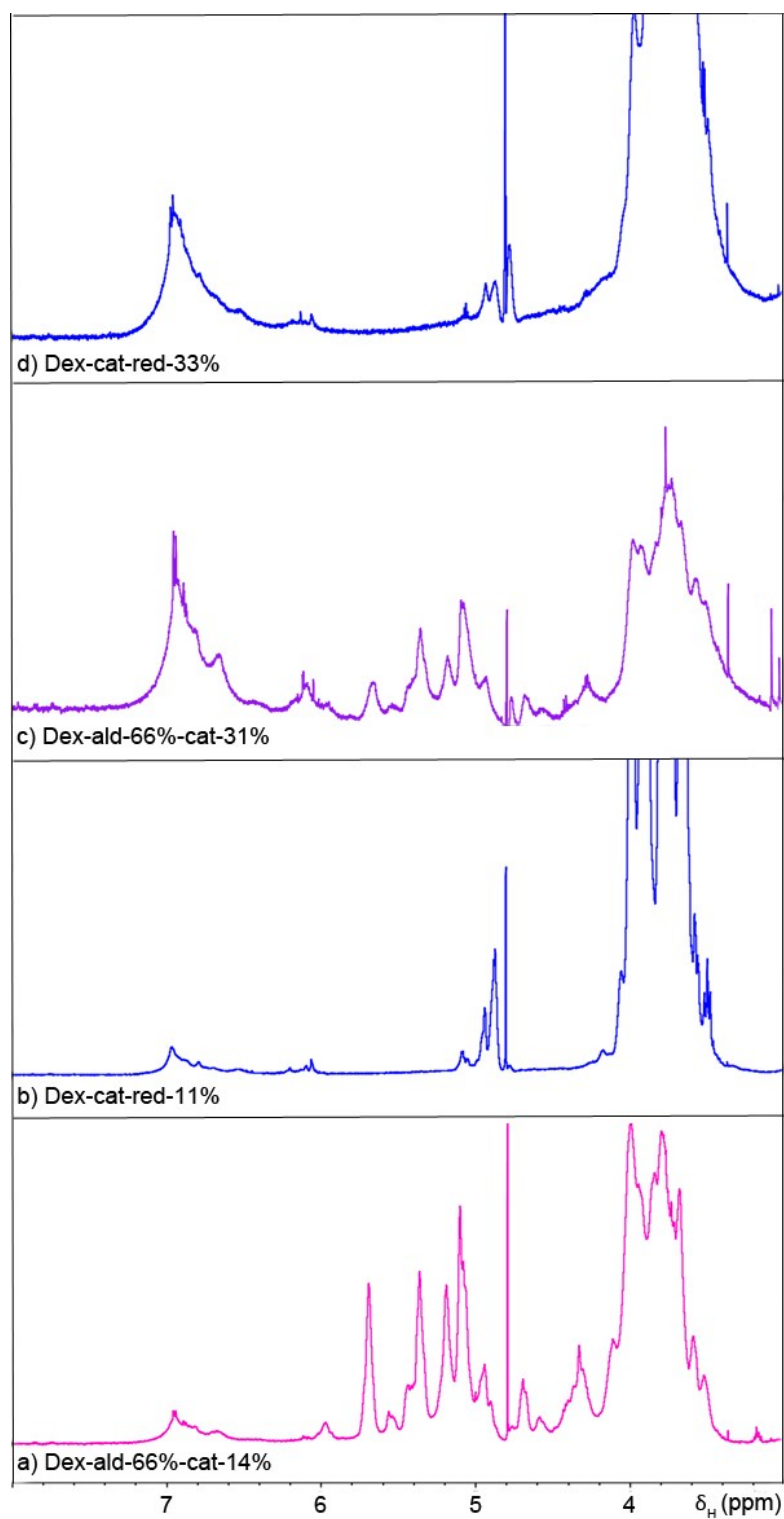

**Figure S3:** Overlay of <sup>1</sup>H NMR spectra in 15% DMSO-d<sub>6</sub> / 85% D<sub>2</sub>O of dex-ald-cat conjugate with 66% oxidation and with 14 wt% (a) and 31 wt% (c) catechin, respectively and conjugates after reduction with sodium borohydride containing 11 wt% (b) and 33 wt% (d) catechin, respectively. Note: (a) was conjugated at 25 °C and (c) was conjugated at 55 °C.

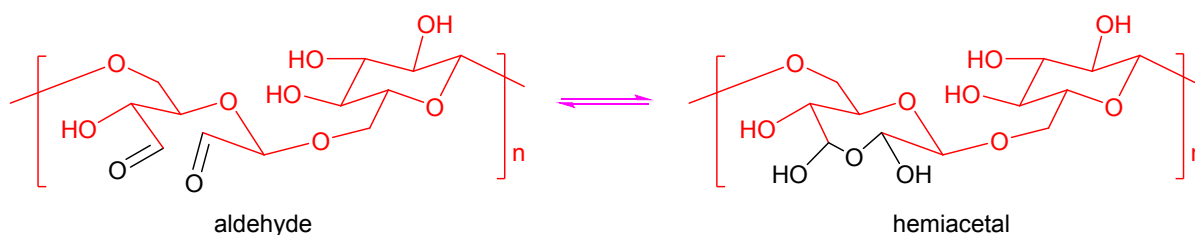

**Scheme S1:** Formation of hemiacetal structure from dextran polyaldehyde according to Aziz *et al.*<sup>1</sup>

**Table S1:** Molecular weight (Mn) and dispersity for dextran, dex-ald, and dex-ald-cat reacted at various temperatures

| Polymer             | Reaction temperature | Mn (g/mol) | Dispersity |
|---------------------|----------------------|------------|------------|
| Dextran             | -                    | 9960       | 1.25       |
| Dex-ald-66%         | 25 <sup>o</sup> C    | 12900      | 1.49       |
| Dex-ald-66%-cat-14% | 25 <sup>o</sup> C    | 20200      | 1.65       |
| Dex-ald-66%-cat-22% | 40 <sup>o</sup> C    | 18100      | 1.68       |
| Dex-ald-66%-cat-31% | 55 <sup>o</sup> C    | 15100      | 1.39       |
| Dex-ald-66%-cat-38% | 70 <sup>o</sup> C    | 6860       | 1.45       |

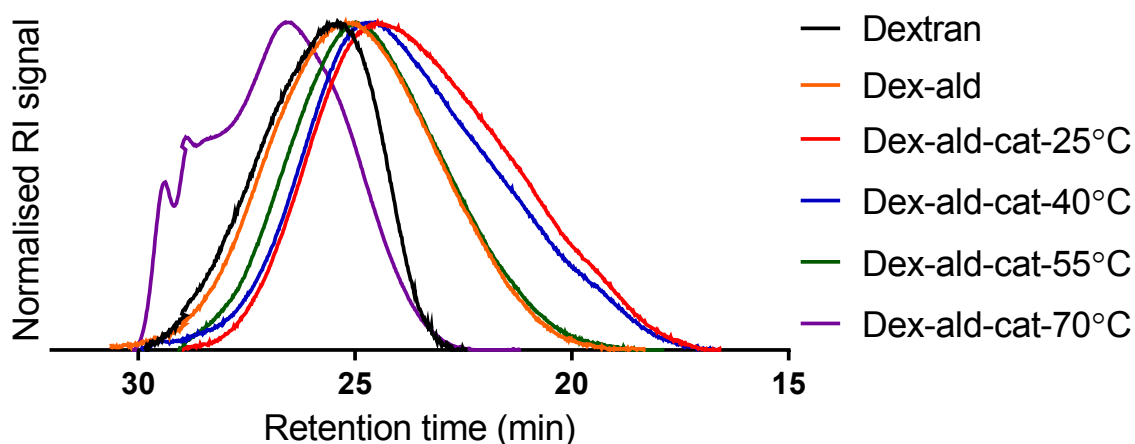

**Figure S4:** SEC traces of dextran, dex-ald, and dex-ald-cat reacted at various temperatures

**Reference:**

1. Aziz, M. A.; Cabral, J. D.; Brooks, H. J. L.; Moratti, S. C.; Hanton, L. R. Antimicrobial Properties of a Chitosan Dextran-Based Hydrogel for Surgical Use. *Antimicrobial Agents and Chemotherapy* 2012, 56, 280-287.
